# Supplementary material for: Deep Eutectic Solvents Mediated Extraction of a Pectin Polysaccharide from Processed Sweet Potato By-Products: Optimization and Characterization Studies
Source: MDPI journal article supplement (doi:10.3390/foods15020388), 2026-01-21
Supplement: s1 [file foods-4068415-supplementary.pdf › foods-4068415-supplementary.pdf]

## Supplementary documents

Ms. Ref. No.: **foods-4068415**

Title: Deep eutectic solvents mediated extraction of a pectin poly-saccharide from processed sweet potato by-products: Optimization and characterization studies

### 1. Mw determination and monosaccharide composition analysis

The weight-average molecular weight ( $M_w$ ) and number-average molecular weight ( $M_n$ ), of the pectins were determined using high-performance size exclusion chromatography coupled to a multiangle laser light scattering refractive index (HPSEC-MALLS-RI,  $\lambda=658$  nm; Wyatt Technologies Corporation, USA). HPSEC-MALLS was performed on an LC-10A Shimadzu HPLC system (Shimadzu, Japan) equipped with a Shimadzu RI-10A refractive index detector (RID, Japan) and a BRT105-103-101 SEC column ( $8 \times 300$  mm, BoRui Saccharide) in a series at 25 °C. A total of 0.05 M NaCl was used as the elution solvent at a flow rate of 1.0 mL/min. Moreover, the pectin samples were dissolved in this solvent at 1.0 mg/mL and filtered through 0.45  $\mu$ m membranes prior to injection. The  $dn/dc$  value used was 0.1380 mg/L. The light scattering model was the Zimm model. The on-line ASTRA 8.1 software package (Wyatt Technologies, USA) was used for data analysis.

High-performance anion-exchange chromatography (HPAEC) using a pulsed amperometric detector (PAD) equipped with a Dionex CarboPac PA- 20 anion-exchange column ( $3 \times 150$  mm, 10  $\mu$ m) was used to test the monosaccharide composition of the pectins. The pectin samples (5 mg) were hydrolyzed with trifluoroacetic acid (TFA, 2 mL, 3 M) at 120 °C for 3 h, followed by transferring to the tube for nitrogen purging and drying. 5 mL water was added and mixed well, then 100  $\mu$ L aqueous solution was added to 900  $\mu$ L of deionized water and centrifuged at 12000 rpm for 5 minutes. Finally, the treated pectin solutions (5  $\mu$ L) were introduced into the system and gradient eluted by mobile phases A ( $H_2O$ ), B (250 mM NaOH) and C (500 mM NaOH & 50 mM NaAc) at a flow rate of 0.3 mL/min. The standard monosaccharides include fucose, rhamnose, arabinose, galactose, glucose, xylose, fructose, galacturonic acid, glucuronic acid, and mannose

## 2. All ELISA original data

**Table S1**

| Cell viability (%) | 0        | 25(μg/mL) | 75(μg/mL) | 100(μg/mL)     | 150(μg/mL)      | 300(μg/mL)      |
|--------------------|----------|-----------|-----------|----------------|-----------------|-----------------|
|                    | 99.8697  | 96.8901   | 98.8236   | 104.5235       | 103.9468        | 101.8567        |
|                    | 100.3464 | 96.1513   | 100.6257  | 101.5365       | 101.7377        | 102.5758        |
|                    | 99.6797  | 97.3546   | 102.8664  | 103.4855       | 102.7567        | 106.5576        |
|                    |          |           |           |                |                 |                 |
|                    |          |           |           |                |                 |                 |
| IL-1β (ng/mL)      | ctrl     | LPS       | DEX       | DESP(75 μg/mL) | DESP(150 μg/mL) | DESP(300 μg/mL) |
|                    | 0.3219   | 6.9346    | 0.4980    | 4.6346         | 2.6580          | 1.9639          |
|                    | 0.3427   | 6.8637    | 0.5320    | 4.8463         | 2.7956          | 1.9197          |
|                    | 0.3641   | 6.6359    | 0.5110    | 4.6978         | 2.8564          | 1.8965          |
|                    |          |           |           |                |                 |                 |
| IL-6 (ng/mL)       | ctrl     | LPS       | DEX       | DESP(75 μg/mL) | DESP(150 μg/mL) | DESP(300 μg/mL) |
|                    | 0.2925   | 4.7589    | 0.5328    | 3.8749         | 2.8750          | 1.7549          |
|                    | 0.2858   | 4.7408    | 0.5905    | 3.6947         | 2.9754          | 1.6438          |
|                    | 0.2883   | 4.5139    | 0.6298    | 3.4770         | 2.5398          | 1.5986          |
|                    |          |           |           |                |                 |                 |
| TNF-a (ng/mL)      | ctrl     | LPS       | DEX       | DESP(75 μg/mL) | DESP(150 μg/mL) | DESP(300 μg/mL) |
|                    | 0.1892   | 2.8304    | 0.6935    | 2.0069         | 1.1090          | 0.9467          |
|                    | 0.1973   | 2.8308    | 0.7246    | 2.2787         | 1.2247          | 0.9037          |
|                    | 0.2341   | 2.6947    | 0.6846    | 2.1897         | 1.2848          | 1.1247          |
